# Supplementary material
Source: HighWire-hosted journal article supplement (https://ajnr-sso.highwirestaging.com/highwire/filestream/60051/field_highwire_adjunct_files/0/17-01117.pdf)
Supplement: 17-01117.pdf [file 17-01117.pdf]

## ON-LINE APPENDIX: SURVEY

Name:

Age:

Gender:

**\*1. In which year of your Radiology training are you?**

- ☐ 1st  
☐ 2nd  
☐ 3rd  
☐ 4th  
☐ 5th  
☐ I completed my radiology residency

comment

**\*2. Are you a certified Neuroradiologist in your country?**

- ☐ yes  
☐ no  
☐ Others (please indicate)

**\*3. How many years of experience do you have working in interventional neuroradiology?**

- ☐ 1 year  
☐ 2 years  
☐ 3 years  
☐ 4 years  
☐ 5 years  
☐ 5-10 years  
☐ >10 years

comment

**\*4. How many intracranial aneurysms did you treat as responsible first operator?**

- ☐ none  
☐ 1-5  
☐ 5-10  
☐ 11-50  
☐ 51-100  
☐ >100

comment

**\*5. In how many intracranial aneurysm procedures did you assist?**

- ☐ none  
☐ 1-5  
☐ 5-10  
☐ 11-50  
☐ 51-100  
☐ >100

comment

**\*6. How many thrombectomies did you perform as responsible first operator?**

- ☐ none  
☐ <5  
☐ 5-10  
☐ 11-50  
☐ 51-100  
☐ >100

comment

**\*7. In how many thrombectomies did you assist?**

- ☐ none
- ☐ 1-5
- ☐ 5-10
- ☐ 11-50
- ☐ 51-100
- ☐ >100

comment

**\*8. In how many endovascular treatments of pAVM or dAVF have you been involved?**

- ☐ none
- ☐ 1-5
- ☐ 5-10
- ☐ 11-50
- ☐ 51-100
- ☐ >100

comment

**\*9. How many intracranial Flow-Disrupting Devices (for example Woven Endobridge Device (WEB), LUNA ...) procedures did you attend?**

- ☐ none
- ☐ 1-5
- ☐ 6-10
- ☐ >10

comment

**\*10. How many intracranial stenting procedures did you attend?**

- ☐ none
- ☐ 1-5
- ☐ 5-10
- ☐ 11-50
- ☐ 51-100
- ☐ >100

comment

**On-line Table: Interrater reliability regarding confidence in diagnostic rating and retreatment approach**

|                                       | Confidence <sup>a</sup><br>$\beta$ | Any<br>Retreatment <sup>b</sup><br>Odds Ratio | Coiling Only <sup>b</sup><br>Odds Ratio | Stent and<br>Coiling <sup>b</sup><br>Odds Ratio | Clipping <sup>b</sup><br>Odds Ratio | Other Endovascular<br>Treatment <sup>b</sup><br>Odds Ratio |
|---------------------------------------|------------------------------------|-----------------------------------------------|-----------------------------------------|-------------------------------------------------|-------------------------------------|------------------------------------------------------------|
| Model without covariates              |                                    |                                               |                                         |                                                 |                                     |                                                            |
| Random effects                        |                                    |                                               |                                         |                                                 |                                     |                                                            |
| Variance between cases                | 0.2126                             | 2.587                                         | 2.5299                                  | 1.6203                                          | 4.6516                              | 1.3113                                                     |
| Variance between patient age subcases | NA                                 | 0.602                                         | <.0001                                  | 0.2088                                          | <.0001                              | <.0001                                                     |
| Variance between raters               | 0.1318                             | 0.962                                         | 0.7178                                  | 0.4327                                          | 1.6951                              | 1.5202                                                     |
| Residual variance                     | 0.4527                             | 1.0000                                        | 1.0000                                  | 1.0000                                          | 1.0000                              | 1.0000                                                     |
| Intraclass correlation                | 0.2667                             | 0.6191                                        | 0.5956                                  | 0.5608                                          | 0.6332                              | 0.3422                                                     |
| Model with covariates                 |                                    |                                               |                                         |                                                 |                                     |                                                            |
| Random effects                        |                                    |                                               |                                         |                                                 |                                     |                                                            |
| Variance between cases                | 0.0365                             | 0.6451                                        | 0.4054                                  | 0.3070                                          | 2.0408                              | 1.1678                                                     |
| Variance between patient age subcases | NA                                 | <0.0001                                       | <.0001                                  | <.0001                                          | <.0001                              | <.0001                                                     |
| Variance between raters               | 0.1505                             | 1.3370                                        | 0.7481                                  | 0.6829                                          | 1.9295                              | 2.1597                                                     |
| Residual variance                     | 0.4527                             | 1.0000                                        | 1.0000                                  | 1.0000                                          | 1.0000                              | 1.0000                                                     |
| Intraclass correlation                | 0.0571                             | 0.2163                                        | 0.1883                                  | 0.1543                                          | 0.4106                              | 0.2699                                                     |

**Note:**—NA indicates not analyzed.

<sup>a</sup>Rated from completely uncertain (1) to completely certain (6).

<sup>b</sup>Binary compared with no treatment; odds ratios of >1 indicate a higher probability of treatment, and odds ratios of <1 indicate a lower probability of treatment with an increase in the predictors.
